# Supplementary material for: Feasibility of a pulsed multiphase contrast media injection protocol in head and neck computed tomography angiography: a systematic retrospective study
Source: PeerJ. 2025 Nov 25;13:e20216. doi: 10.7717/peerj.20216 (PMC12662063; doi:10.7717/peerj.20216)
Supplement: Supplemental Information 1 [file peerj-13-20216-s001.xlsx]

## Sheet: Sheet1
						Target vessel CT value (HU).									Subjective image quality scoring.
Patient group.(1=conventional group, 2=pulse group)	Gender.（1=male, 2=female）	Age.	Height (cm).	Body weight (kg).	DLP	The M1 segment of the middle cerebral artery.	Aortic arch.	Internal carotid artery C2 segment.	Vertebral artery.	Common carotid artery.	Subclavian vein injection site.	Superior vena cava at the level of the aortic arch.	BMI	ED	Physician 1.	Physician 2.	CNR of the M1 segment of the middle cerebral artery.	SNR of the M1 segment of the middle cerebral artery.	Aortic CNR.	Aortic SNR.	C2 segment of the internal carotid artery CNR.	C2 segment of the internal carotid artery SNR.	Vertebral Artery CNR.	Vertebral Artery SNR.	Common Carotid Artery CNR.	Common Carotid Artery SNR.
1	1	68	170	80	835.43	357.5	521.3	423.5	564.4	524.2	559.5	161.7	27.68	1.92	4	4	34.85	45.19	56.3	66.64	39.56	50.41	57.7	68.05	59.3	69.64
1	1	66	170	75	819.98	397.7	462.8	430.3	450.95	448.3	860.8	232.6	25.95	1.89	4	3	22.95	28.11	27.63	32.79	23.14	28.8	24.9	30.07	28.02	33.18
1	2	50	163	55	766.74	431.5	389.4	608.5	620.9	586	611.7	297.7	20.7	1.76	3	3	20.33	25.05	29.56	34.27	28.92	34.14	30.06	34.78	30.53	35.25
1	1	59	160	75	795.89	484.1	343	520.2	304.35	513.6	362.6	152.9	29.3	1.83	3	3	16.96	19.59	19.32	21.95	17.21	20.34	9.16	11.79	18.95	21.58
1	2	68	163	60	749	388.8	436.2	423.7	448.2	402.8	487.8	244.1	22.58	1.72	3	3	9.16	11.07	10.45	12.36	9.29	11.7	10.69	12.6	10.09	12
1	2	64	160	70	767.62	493.3	501.7	482.35	543.4	499.95	300.4	197.1	27.34	1.77	4	3	20.52	23.16	20.92	23.56	18.61	21.75	22	24.64	21.77	24.41
1	1	49	172	78	804.37	442.5	454.2	449.55	467.55	425.25	742.8	241.1	26.37	1.85	3	3	16.87	20.4	17.41	20.94	15.81	19.85	17.18	20.71	16.99	20.53
1	1	55	165	67.5	775.02	522.7	546.7	515.75	513.85	498.25	665.4	216.1	24.79	1.78	3	3	18.16	20.27	19.08	21.19	16.74	19.35	17.29	19.39	17.99	20.1
1	2	86	155	67.5	764.62	402.1	539.1	537	576.3	548.4	166.8	97.2	28.1	1.76	4	5	16.91	19.76	23.64	26.49	22.07	25.41	24.5	27.35	25.08	27.93
1	2	59	155	55	721.79	488.9	504.1	498.8	521.4	487.05	127	104.9	22.89	1.66	3	3	29.8	34.83	30.9	35.93	28.35	33.88	30.26	35.29	31.11	36.14
1	2	59	152	50	752.19	500.4	399.5	473.05	508.9	660.5	241.1	199.6	21.64	1.73	3	3	15.12	18.03	22.18	25.08	13.09	16.49	15.01	17.91	21.51	24.41
1	1	39	172	86.5	786.42	453.5	444.7	434.6	454.7	452.35	600.3	264.9	29.24	1.81	3	3	15.02	17.48	14.69	17.15	13.17	16.12	14.55	17.01	15.74	18.2
1	2	55	158	50	765.17	513.7	569.9	562.5	453.4	569.4	398.2	179.6	20.03	1.76	5	5	26.47	30.84	29.86	34.23	27.6	32.47	21.41	25.78	31.04	35.41
1	1	56	172	71	833.86	405.2	417	416.7	419.6	395.25	613.6	241.6	24	1.92	3	3	18.98	22.62	19.64	23.28	17.94	22.08	18.54	22.18	19.54	23.18
1	1	49	165	70	793.43	448.8	475.2	468.2	503.55	463.8	370.2	180.6	25.71	1.82	4	4	17.18	21.42	18.43	22.68	16.67	21.41	18.88	23.12	18.84	23.08
1	1	67	170	80	788.01	324.6	458.4	408.85	284.55	433.95	542.7	336.6	27.68	1.81	3	3	13.79	17.89	21.21	25.31	16.8	21.4	10.35	14.45	20.97	25.07
1	2	66	154	63.5	720.2	587.5	358.4	631.6	662.25	653.7	295.5	186.6	26.78	1.66	3	3	20.52	22.34	23.19	25.01	21.05	23.38	22.83	24.65	23.76	25.59
1	1	51	173	77.5	812.07	386.3	447.8	429.8	463.5	422.15	216.5	135.8	25.89	1.87	4	3	17.76	21.08	21.13	24.45	18.5	22.32	20.8	24.12	20.82	24.14
1	1	70	170	60	827.02	425.1	500	483.85	522.55	483.45	678.6	253.5	20.76	1.9	3	3	14.41	17.75	17.5	20.85	15.59	19.44	17.78	21.13	17.65	20.99
1	1	53	160	75	752.21	456.3	332.4	521.25	539.25	534.75	182.6	115.2	29.3	1.73	4	4	20.74	25.2	24.96	29.42	22.68	27.64	24.12	28.58	26.2	30.66
1	1	56	173	60	737.57	542.9	562.1	566.85	596.3	559.8	572.4	138.1	20.05	1.7	4	3	22.06	24.55	22.92	25.42	21.79	24.78	23.66	26.15	23.72	26.21
1	1	68	165	65	803.47	431	461.8	438.8	490.5	457.5	1278.8	468.6	23.88	1.85	3	3	18.01	22.06	19.58	23.64	16.87	21.42	20.01	24.06	20.39	24.44
1	1	41	172	97.5	766.24	429.3	436.6	423.35	440.2	407.95	479.8	254.3	32.96	1.76	3	3	20.5	25.32	20.94	25.75	18.37	23.68	19.77	24.59	20.42	25.24
1	2	76	155	57	739.9	637.8	388.6	697.15	739.9	691.75	214.2	140	23.73	1.7	4	3	24.98	28.74	27.26	31.02	26.3	30.55	28.77	32.52	28.3	32.06
1	1	49	169	70	803.48	474	518	489	547.8	495.1	315.9	111.8	24.51	1.85	4	4	14.61	16.93	16.16	18.48	14.09	16.91	16.8	19.12	16.05	18.37
1	2	52	160	67.5	791.87	348	375.2	406.8	428.05	383.75	2035.5	689.2	26.37	1.82	3	3	19.73	24.55	21.68	26.5	21.8	27.11	23.6	28.42	23.73	28.55
1	1	60	178	65	768.38	386	452.8	443.8	506.95	468.35	287.9	198	20.52	1.77	3	3	13.5	16.45	16.32	19.27	14.67	18.12	17.91	20.87	17.82	20.77
1	1	62	175	62.5	817.41	365.5	416.5	408.45	436	391.3	604.4	317.6	20.41	1.88	3	3	14.76	18.96	17.41	21.62	15.44	20.14	17.35	21.55	17.14	21.34
1	1	29	184	65	849.51	397.3	435.5	453.7	451.3	417.15	395.2	156.7	19.2	1.95	3	3	12.23	15.38	13.68	16.84	13.23	16.89	13.76	16.92	13.75	16.9
1	2	53	160	50	791.85	443	509.1	500.65	523.5	484.65	946.1	199	19.53	1.82	3	3	12.95	15.63	15.23	17.91	13.9	17.08	15.35	18.03	15.08	17.76
1	2	49	163	83	767.14	350.8	387.3	411.1	411.55	373.25	399.4	210.4	31.24	1.76	3	3	8.18	9.78	9.15	10.75	8.98	11.08	9.73	11.33	9.3	10.9
1	1	60	170	80	766.26	434.7	457.3	482.7	483.85	440.6	675.4	418.2	27.68	1.76	3	3	9.34	11.4	9.91	11.97	9.8	12.35	10.57	12.63	9.99	12.05
1	2	78	178	80	764.5	358.3	511.6	508.35	527	498.85	638.2	408.5	25.25	1.76	3	3	11.81	14.63	17.99	20.81	16.65	19.97	18	20.82	18.28	21.1
1	1	67	173	78	812.13	402.6	446.2	562.75	441.05	419.75	384.2	202.1	26.06	1.87	3	3	9.45	10.89	10.58	12.02	12.82	14.76	10.41	11.85	10.41	11.85
1	2	46	170	80	803.52	284.3	318.9	352.05	352.25	309.65	620.9	220.5	27.68	1.85	3	3	9.41	12.29	10.89	13.77	11.03	14.41	11.61	14.49	11.35	14.23
1	1	68	170	70	820.56	408.1	468.5	469.65	483.55	458.55	791.6	304	24.22	1.89	3	3	20.02	23.31	23.49	26.78	21.83	25.62	23.06	26.35	24.07	27.36
1	2	80	150	64	721.31	908	1038.5	1032.8	1024.55	1100.95	348.6	171.7	28.44	1.66	3	3	34.37	37.19	39.69	42.51	38.23	41.55	38.49	41.31	43.05	45.87
1	2	71	160	65	767.86	421.8	617.5	545.4	643.4	608.8	570.7	178.2	25.39	1.77	3	3	11.97	13.97	18.29	20.29	15	17.5	18.84	20.84	18.66	20.66
1	1	34	170	100	773.25	341	578.8	472.75	531.35	507.15	421.6	580.3	34.6	1.78	3	3	10.03	11.44	17.77	19.17	13.34	15.24	15.92	17.32	16.09	17.49
1	1	52	180	85	834.69	332.7	407.8	398.2	400.6	373.95	500.5	177.6	26.23	1.92	3	3	11.53	14.4	14.74	17.62	13.05	16.42	13.72	16.6	14.15	17.03
1	1	43	178	71.5	814.67	369.5	424.7	451.9	451.2	427.6	791	285.1	22.57	1.87	3	3	12.85	15.75	15.18	18.08	15.06	18.47	15.61	18.51	16.15	19.05
1	2	50	155	65	796.35	340.7	386.1	356.7	425.5	354.5	760.1	426.7	27.06	1.83	3	3	10.94	13.88	12.76	15.71	10.38	13.82	13.74	16.68	12.29	15.24
1	2	67	162	54	785.26	503	521.1	528.1	553.5	500.6	706.7	552.6	20.58	1.81	3	3	20.58	23.92	21.43	24.78	20.34	24.19	22.07	25.42	21.41	24.76
1	1	65	169	75	736.08	332.2	371.6	373.7	374.2	310	696.7	275.8	26.26	1.69	3	3	6.87	8.72	7.84	9.7	7.15	9.51	7.92	9.77	6.8	8.7
1	2	58	158	60	813.24	346.6	424.2	385.9	376.8	392.3	2110.2	934	24.03	1.87	4	3	12.18	14.72	15.44	17.98	12.57	15.61	12.77	15.31	14.9	17.5
1	2	72	160	70	799.3	530.4	614	633.3	619.6	604.7	93.6	105.7	27.34	1.84	3	3	27.18	31.3	32.14	36.26	31.5	36.13	31.1	35.22	32.8	36.9
1	1	52	170	85	835.64	240.2	339.7	260.2	346.6	310.6	936.3	248.6	29.41	1.92	3	3	6.24	7.73	9.28	10.77	5.94	7.92	9.27	10.76	9	10.5
1	1	58	178	70	746.27	327.2	459.7	485.9	524.8	457.5	232.4	285.8	22.09	1.72	4	5	8.09	10.77	12.3	14.98	12.18	15.36	14.1	16.78	12.9	15.5
1	2	58	174	65	752.94	513.3	526.2	500	561.4	516.1	238.8	188.7	21.47	1.73	3	3	25.04	28.45	25.76	29.17	22.63	26.54	26.49	29.91	26.3	29.7
1	2	71	156	50	825.61	503.5	501.1	497.1	563.2	481	359.3	308.4	20.55	1.9	3	3	16.64	20.1	16.55	20.01	15.21	19.16	18.42	21.88	16.5	20
1	1	51	170	75	782.04	357.9	505.4	469.4	486.7	439.8	159.5	95.5	25.95	1.8	3	3	8.81	10.35	12.9	14.44	11.07	13.11	12.27	13.81	11.6	13.2
1	1	65	170	65	724.53	360	485.5	415.5	474	464	696.7	434.6	22.49	1.67	3	3	6.74	8.42	9.48	11.16	7.3	9.48	9.36	11.04	9.4	11.1
1	1	60	170	70	911.47	302.9	378.2	317.8	393.8	317.4	622.8	414.8	24.22	2.1	3	3	8.48	9.82	10.83	12.16	8.01	9.84	11.07	12.4	9.6	10.9
1	1	55	170	70	782.63	404.3	473.7	479.8	472.3	423.4	454.2	205.4	24.22	1.8	3	3	16.85	20.53	20.38	24.06	19.16	23.34	19.27	22.95	18.8	22.5
1	2	70	158	55	831.75	395	471.8	442.5	506.3	471	607.1	227.4	22.03	1.91	5	5	15.17	17.61	18.57	21.02	15.94	18.89	19.33	21.77	19.4	21.9
1	1	57	162	78	782.5	346	411.1	399.1	396.5	352.5	174.9	207.2	29.72	1.8	3	3	21.37	25.97	26.36	30.96	23.14	28.24	23.18	27.77	23.4	28
1	2	62	160	80	753.95	415.5	449.2	511.5	489.2	469.9	342.6	220.3	31.25	1.73	4	4	10.73	12.81	11.74	13.82	12.7	15.28	12.74	14.82	13	15
1	1	36	170	88	814.28	452.7	525.7	525.9	502.6	501.2	1381.4	428.8	30.45	1.87	3	3	25.11	28.81	29.8	33.51	27.89	32.09	26.75	30.45	29.5	33.2
1	1	56	157	88	754.29	349	398	391.1	465	367.6	453.2	247.2	35.7	1.73	3	3	59.88	74.26	70.79	85.17	62.57	77.46	77.8	92.19	68.5	82.9
1	1	72	183	95	726.49	205.6	368.3	338.7	297.7	246.8	383.1	204.5	28.37	1.67	4	3	4.82	7.52	10.53	13.24	8.44	11.65	7.65	10.35	7	9.7
1	2	65	160	65	827.04	408.5	470.4	493.3	480.8	473.1	473	365.4	25.39	1.9	3	3	21.73	26.08	25.72	30.07	25.26	30.11	24.81	29.16	27.2	31.5
1	1	66	172	60	736.52	451.8	456.7	496.8	555.1	509.7	147.4	146.6	20.28	1.69	4	4	12.47	15.09	12.63	15.25	12.96	16.08	15.54	18.16	15	17.6
1	2	71	168	50	721.19	381.4	641.6	616	675.2	604.3	563.1	268.9	17.72	1.66	4	3	25.77	30.51	47.02	51.75	42.48	47.71	47.5	52.23	45.6	50.3
1	1	63	175	80	731.42	284.7	390.5	379.3	408.5	376.4	293	301.1	26.12	1.68	3	3	10.25	13.67	15.31	18.74	13.34	17.27	15.26	18.69	15.6	19
1	1	39	163	65	767.79	357.3	403	407.1	457.3	387.4	548.9	165.3	24.46	1.77	3	3	8.26	10.04	9.49	11.26	8.79	11.07	10.87	12.64	9.6	11.4
1	2	58	150	66	788.2	431.7	438.3	438.8	479.8	434.3	551.9	196.2	29.33	1.81	4	3	13.06	16.01	13.3	16.25	12.23	15.67	14.36	17.3	13.9	16.8
1	1	73	167	85	812.57	397.2	420.8	468	489	443.9	801.4	253.9	30.48	1.87	3	3	19.59	23.65	21.01	25.07	22.04	26.61	23.7	27.77	23.6	27.7
1	1	68	170	65	803.98	364	498.3	445.9	481.9	463.6	843.4	561.9	22.49	1.85	4	4	7.88	10.26	11.49	13.87	9.27	12.16	10.97	13.36	11.1	13.5
1	1	63	170	76	835.21	455	488	473.8	537.6	487.7	436.9	164.5	26.3	1.92	4	3	21.37	25.3	23.22	27.15	20.75	25.18	24.75	28.68	24.3	28.2
1	2	71	164	65	817.49	435.8	502.1	559.4	567.6	517.3	501.9	144.5	24.17	1.88	3	3	22.6	26.43	26.65	30.49	28.32	32.66	29.21	33.05	28.8	32.6
1	2	69	150	73	820.73	397	448.5	468.1	478.6	453.3	561.3	353.6	32.44	1.89	3	3	13.71	16	15.76	18.05	15.35	18.13	16.37	18.65	16.7	19
1	2	50	150	75	773.57	486.6	511	521.3	538.8	513.1	359.6	193.6	33.33	1.78	4	3	14.01	16.65	14.83	17.47	14.17	17.31	15.42	18.06	15.6	18.2
1	2	67	155	50	791.82	501	616.6	597	600.3	601.7	375.5	238.9	20.81	1.82	4	4	39.4	44.54	49.87	55	45.38	51.01	45.77	50.9	50.3	55.5
1	2	69	150	35	814.2	346.6	501.7	486.6	527.7	470.7	1121.6	571.2	15.56	1.87	3	3	13.35	16.08	20.51	23.23	18.42	21.65	20.86	23.59	20	22.7
1	1	58	178	85	720.89	382.3	392.4	403.2	438.5	382.9	569	309.3	26.83	1.66	3	3	12.2	14.11	12.56	14.48	11.87	14.28	13.78	15.7	12.9	14.9
1	1	54	170	65	764.38	442.7	479.7	433.7	527.9	464.4	512.3	144	22.49	1.76	3	3	13.29	15.38	14.55	16.63	11.97	14.55	15.83	17.91	14.7	16.8
1	2	49	155	60	826.9	445.5	434.8	433.7	497	444.9	542.1	291.9	24.97	1.9	3	3	2.67	2.93	2.62	2.88	2.48	3.24	3.72	3.98	2.8	3
1	1	71	167	65	742.32	365.2	387.2	396.1	442.3	374.1	273	169.5	23.31	1.71	3	3	9.38	11.69	10.07	12.37	9.41	12.22	11.53	13.84	10.3	12.6
1	1	57	172	80	744.83	357.5	438.6	365.2	419.5	360.9	740.6	411.6	27.04	1.71	3	3	11.35	14.76	14.65	18.07	10.44	14.35	13.24	16.66	12.3	15.7
1	1	64	175	75	810.7	324.4	263.6	359.2	422.3	361.8	1029.6	197.1	24.49	1.86	3	3	8.93	11.6	6.81	9.48	9.09	12.27	11.94	14.62	10.9	13.6
1	2	71	165	55	750.66	565.4	539.3	605.6	631.1	599.6	112.7	72.3	20.2	1.73	3	3	15.49	18	14.67	17.19	15.81	18.82	17.29	19.81	17.2	19.7
1	2	73	153	50	794.53	500.5	622.9	637.7	629.5	635.2	337.4	205.9	21.36	1.83	3	3	22.82	27.09	29.47	33.74	28.65	33.41	28.66	32.93	31.2	35.5
1	1	61	176	65	800.68	423.5	469.4	438.7	477.2	430.7	758	431	20.98	1.84	3	3	8.11	9.54	9.08	10.51	7.8	9.72	9.4	10.83	8.7	10.1
1	1	64	170	65	804.56	392.5	419.7	373	443.3	405.3	619.6	347.5	22.49	1.85	3	3	10.05	12.69	10.91	13.55	8.5	11.64	11.39	14.03	11.1	13.7
1	1	71	170	60	759.63	436.8	473.4	432.1	446.3	466.3	316.4	172.8	20.76	1.75	3	3	3.24	3.76	3.48	4	3.01	4.03	4.04	4.55	3.6	4.1
1	2	72	160	55	779.27	523.2	536.9	521.9	549.5	513.5	613.3	361.5	21.48	1.79	3	3	3.45	3.71	3.53	3.79	3.28	4.04	4.38	4.64	3.5	3.8
1	1	44	175	80	719.52	398	425.5	441.2	458.6	410.8	442	339.8	26.12	1.65	5	5	4.77	5.38	5.09	5.7	4.93	6.03	6.01	6.62	5.2	5.8
1	1	70	168	75	797.12	329.1	421.6	399.7	411.8	368.3	610.4	314.8	26.57	1.83	3	3	11.88	13.77	15.7	17.59	13.56	15.94	14.65	16.53	14.3	16.2
1	1	63	175	74	752.3	405	499.2	410.7	465.6	446.1	704	397.2	24.16	1.73	4	4	12.21	14.09	15.41	17.29	11.38	13.76	13.91	15.79	14.3	16.2
1	1	60	164	69	803.75	474.4	536.3	505.1	533.5	484.2	227.3	117.5	25.65	1.85	3	3	12.41	15.06	14.33	16.98	12.44	15.59	14.01	16.66	13.3	16
1	1	61	175	65	769.83	483	504.5	497.3	512.7	488	1189.8	81	21.22	1.77	3	3	7.73	8.9	8.09	9.27	7.46	9.13	8.55	9.73	8.2	9.3
1	1	54	167	75	748.84	466.4	511.2	491.5	538.4	485.9	228.4	143.2	26.89	1.72	4	3	16.32	18.04	18.02	19.75	16.13	18.35	18.54	20.26	17.8	19.5
1	1	77	178	80	783.34	346	464.5	383.2	362	433.9	390.2	272	25.25	1.8	3	3	6.17	7.4	8.5	9.72	6.32	8.04	6.7	7.92	8.3	9.5
1	2	65	157	50	828.76	323.5	351.5	365.4	406.6	355.7	664	295.2	20.28	1.91	4	4	8.93	11.62	9.91	12.6	9.34	12.54	11.43	14.13	10.8	13.4
1	2	62	160	60	765.23	452.2	459	458.6	516.3	461.9	1134.1	538.5	23.44	1.76	4	3	18.05	21.22	18.37	21.54	16.95	20.62	20.18	23.35	19.4	22.6
1	2	60	160	55	759.63	195.2	558.6	563.9	505	554.4	232	258.8	21.48	1.75	3	3	6.37	8.2	21.3	23.13	20.29	22.62	18.46	20.28	22	23.8
1	2	59	160	65	815.76	511.8	507	564.3	638.2	552.6	262.6	128	25.39	1.88	3	3	17.27	19.53	17.09	19.34	18.12	20.87	21.53	23.78	19.6	21.8
1	2	48	160	60	745.73	382.3	510.4	457	526.5	508.1	271.7	178.7	23.44	1.72	4	3	13.36	17.13	19.06	22.83	15.35	19.61	19	22.76	19.8	23.6
1	2	69	160	55	722.64	356.3	459.4	513	442.2	406.1	247.3	151.6	21.48	1.66	4	4	13.3	14.65	17.49	18.83	18.44	20.29	16.16	17.51	16.1	17.5
1	1	56	168	65	739.45	276.7	382.9	426.1	450.3	420.7	206.4	127.5	23.03	1.7	3	3	7.05	9.1	10.41	12.45	10.82	13.37	12.27	14.32	12.2	14.3
1	2	68	162	60	837.53	345.3	503.3	519	484.2	473.7	508.1	351.3	22.86	1.93	3	3	19.51	21.38	29.41	31.28	28.52	30.88	26.71	28.58	28.8	30.7
1	2	64	162	70	709.23	354.8	515.9	622.8	546.3	544.7	515.8	202.9	26.67	1.63	3	3	8.4	10.63	13.03	15.26	15.24	17.97	13.75	15.98	14.4	16.7
1	1	67	170	65	793.53	366.6	366.9	318.9	377.2	326.9	146	170.2	22.49	1.83	3	3	9.57	11.6	9.58	11.61	7.19	9.72	9.67	11.7	9	11
1	1	62	175	75	723.93	259.5	407.4	383	416.3	379.8	532.6	293.9	24.49	1.67	3	3	10.97	14.97	19.6	23.59	16.42	20.92	18.78	22.78	19.2	23.1
1	2	70	155	51	817.28	213.4	606.1	616.4	389.8	611.3	669.4	152.9	21.23	1.88	3	3	8.68	11.28	29.57	32.17	28.52	31.62	16.94	19.54	30.9	33.5
1	1	65	170	88	732.87	284.4	650.4	599.9	470.6	690.6	797.5	245.4	30.45	1.69	3	3	3.95	4.69	9.06	9.8	7.93	9.18	6.99	7.73	9.9	10.6
1	1	49	175	65	704.38	211	440.3	448.3	467.6	453.6	478.2	312.1	21.22	1.62	3	3	6.61	9.34	16.62	19.35	15.66	18.89	17.07	19.79	18.1	20.8
1	1	57	160	75	720.94	338.8	467.7	476.3	524	443.2	189.7	148.7	29.3	1.66	3	3	29.19	34.96	42.92	48.69	40.64	46.91	45.66	51.42	42.4	48.2
1	1	61	169	76	826.87	550.8	559.3	571	509.5	558	349.8	144.1	26.61	1.9	4	3	30.99	34.31	31.52	34.84	30.37	34.19	26.89	30.21	32.7	36
1	1	67	177	85	727.53	293	371.4	382.5	397.8	366.8	624.6	543.8	27.13	1.67	3	3	5.41	5.95	6.83	7.37	6.49	7.53	7.58	8.13	7.1	7.7
1	1	60	172	87	825.04	473.2	482.7	531.4	558.4	504.4	141.6	113.8	29.41	1.9	3	3	66.04	78.26	67.66	79.88	70.84	83.57	74.74	86.97	74.8	87
1	2	63	175	72	739.39	427.6	549.1	586.8	633.3	566	385.5	367.5	23.51	1.7	4	5	18.23	21.22	24.26	27.25	24.64	28.13	27.45	30.44	26.1	29.1
1	1	69	166	70	725.95	220.6	397.6	386.4	436.9	378.8	251.8	225.6	25.4	1.67	3	3	4.76	7.25	10.28	12.77	9	11.98	11.26	13.74	10.3	12.8
1	1	37	170	73	826.84	391	293.1	401.6	438.3	386.3	595.9	677.1	25.26	1.9	3	3	10.63	12.42	7.62	9.41	10.03	12.33	11.86	13.65	11.1	12.9
1	2	55	160	69	737.98	245.8	497.5	508.4	508.8	597.1	756.5	544.6	26.95	1.7	3	3	8.75	13.02	22.15	26.42	21.13	25.9	21.62	25.89	28.5	32.8
1	2	71	165	60	835.72	304.5	503.8	512.5	540.5	495.3	333.1	144	22.04	1.92	5	5	7.98	10.24	14.45	16.71	13.76	16.52	15.35	17.6	14.8	17.1
1	2	54	168	80	814.57	248.1	617.3	590.7	483.1	574.8	1007.5	847.7	28.34	1.87	3	3	5.29	6.08	13.51	14.3	12.25	13.54	10.63	11.42	13	13.8
1	1	76	168	70	749.74	273.1	451.3	460.3	473.3	441.9	109.4	184.2	24.8	1.72	4	4	7.88	10.38	14.48	16.98	13.7	16.7	14.81	17.31	14.9	17.4
1	2	64	165	50	853.62	406	418.4	447.5	451.3	419.2	831.2	749.8	18.37	1.96	3	3	14.9	17.6	15.48	18.12	15.44	18.58	16.17	18.81	16.37	19.01
1	2	42	155	55	739.14	352.7	401.9	436.8	416	431	835	664.6	22.89	1.7	5	5	15.7	18.7	18.32	21.34	18.58	22.1	17.94	20.96	20.93	23.95
1	2	56	158	55	867.32	498.6	521.1	495.5	571	525.5	131.7	130.8	22.03	1.99	3	3	12.2	14.3	12.78	14.93	11.23	13.89	14.05	16.21	13.46	15.61
1	2	68	160	70	799.38	353.8	436	420	446.3	496.2	477.5	331.7	27.34	1.84	4	4	10.6	13.1	13.55	16.09	11.88	14.92	13.47	16.02	16.46	19
1	2	61	152	51.5	739.4	454.1	555	538.8	562.4	531	694.9	295.7	22.29	1.7	3	3	11.7	13.5	14.6	16.37	13.28	15.54	14.67	16.43	14.49	16.25
1	2	64	150	64	821.33	393.9	390.3	422.8	448.3	428.6	792.6	772.7	28.44	1.89	3	3	8.8	10.8	8.74	10.75	8.8	11.32	10.21	12.23	10.27	12.29
1	1	63	170	70	796.3	505.2	605.1	415.6	644.6	606.5	816.5	295.5	24.22	1.83	4	3	16.6	19	20.34	22.73	12.18	15.08	21.32	23.72	21.13	23.53
1	1	61	170	70	822.31	339.5	337.1	354.7	434.3	249.3	178.7	161.4	24.22	1.89	3	3	7.3	8.6	7.21	8.53	6.92	8.74	9.57	10.89	5.6	6.92
1	2	47	162	80	810.28	389.5	385.7	417.5	482	415.5	222.3	227.4	30.48	1.86	4	4	9.5	11.5	9.38	11.41	9.43	11.96	11.98	14.01	10.79	12.82
1	2	43	172	60	763.45	417	434.3	481.2	501.5	425.7	814.1	507.6	20.28	1.76	4	3	8.3	9.5	8.68	9.82	9.04	10.68	10.26	11.4	8.93	10.07
1	1	43	174	100	768.5	405.1	519.6	508.3	560	495.6	479.2	248.1	33.03	1.77	3	3	16.3	19.1	21.7	24.53	19.76	23.09	22.72	25.55	21.51	24.34
1	2	54	150	128	831.17	366.3	452.1	553.7	468.7	432.2	497.9	257.7	56.89	1.91	3	3	10.4	12.3	13.22	15.04	15.54	17.86	13.46	15.28	13.22	15.04
1	2	71	155	45	790.37	381.1	449.2	418.2	451.3	414.7	221.7	101.8	18.73	1.82	4	3	9.2	10.8	11.09	12.68	9.43	11.52	11.05	12.65	10.69	12.29
1	1	67	165	72.5	794.65	316.3	440.1	449.5	490.7	450.8	559.3	192.2	26.63	1.83	3	3	10.8	13.7	16.14	19.01	15.25	18.62	17.59	20.46	17.45	20.32
1	1	43	182	95	827.34	378.9	373.7	548.3	399.8	352.1	576.1	265.7	28.68	1.9	4	4	7.4	8.9	7.26	8.77	10.43	12.45	7.95	9.46	7.22	8.73
1	1	65	162	72.5	796.74	366.6	483.7	460.1	515	476.5	378.5	209.8	27.63	1.83	4	3	5.1	6	6.83	7.66	6.06	7.39	7.7	8.54	7.01	7.85
1	1	65	170	45	814.02	372.5	479.8	478.4	507.5	436.5	243.1	204.4	15.57	1.87	3	3	8.6	10.2	11.39	13.01	10.57	12.69	12.07	13.69	10.78	12.41
1	2	55	160	70	833.16	436.7	452.5	438.1	466.3	430.6	481.3	201.7	27.34	1.92	3	3	13.6	15.6	14.17	16.13	12.62	15.08	14.26	16.22	14.11	16.07
1	1	60	164	69	721.07	493.3	529	493.6	562.3	536	404.5	108.3	25.65	1.66	4	3	11	12.8	11.92	13.65	10.29	12.53	12.75	14.49	12.59	14.32
1	1	60	176	85	766.35	403.4	464.7	460.7	489.3	451.1	201.7	150.4	27.44	1.76	4	4	12.5	15.2	14.77	17.5	13.51	16.74	15.2	17.93	15	17.73
1	2	60	160	60	804.37	360.5	586.6	340.5	643	606	496.5	428.6	23.44	1.85	3	3	9.4	10.9	16	17.55	7.94	9.98	17.48	19.03	17.15	18.7
1	1	66	170	80	764.9	448.7	500.8	487.8	521	490.8	132.2	134.4	27.68	1.76	4	3	5	5.9	5.61	6.47	5.12	6.48	6.39	7.24	5.73	6.58
1	2	44	165	65	812.47	338.8	507.9	443	427.6	465	127.6	107.6	23.88	1.87	3	3	8	10.1	12.82	14.94	10.11	12.73	10.38	12.5	12.17	14.29
1	2	48	158	60	768.32	331.5	469.3	476.3	498.5	453.7	958	294	24.03	1.77	3	3	4.8	5.8	6.99	7.99	6.63	8.13	7.82	8.82	7.06	8.06
1	1	64	170	75	766.51	388	464.8	489.2	522.3	417.1	176.4	92.6	25.95	1.76	4	3	15	18	18.54	21.54	18.28	21.78	20.35	23.34	17.26	20.26
1	2	56	160	49	837.21	325.5	566.5	497	573	519.5	379.2	601	19.14	1.93	3	3	7.1	8.8	13.27	14.93	10.73	12.89	13.41	15.07	12.58	14.24
1	2	59	148	61.5	794.3	404	628.7	615.5	649.4	629.2	593.4	214.6	28.08	1.83	4	4	15.6	18.6	25.93	28.9	23.95	27.42	26.04	29.02	26.87	29.84
1	1	43	172	79.5	720.35	345.5	421.4	469.3	469	434	509.9	270.4	26.87	1.66	4	3	6.9	8.3	8.66	10.06	9.06	10.97	9.83	11.23	9.39	10.8
1	1	72	172	53	826.3	320.3	385.9	342.7	395	346	801	787	17.92	1.9	3	3	5.4	6.7	6.64	7.97	5.25	7.07	7.05	8.38	6.26	7.59
1	1	71	170	80	744.8	333.1	390.1	484.7	390.8	363.8	564.4	350.3	27.68	1.71	3	3	10	12.3	12.06	14.39	14.39	17.23	11.63	13.97	11.83	14.16
1	1	76	165	67.5	839.28	515	610.5	568	638.1	605.5	421.7	186.2	24.79	1.93	4	3	7.7	9.3	9.34	10.9	8.12	10.19	10.13	11.69	9.59	11.15
1	1	57	168	80	814.57	431.1	449.9	501.6	476.3	442	524.8	665.8	28.34	1.87	4	4	6.9	8	7.22	8.31	7.59	9.18	7.99	9.08	7.42	8.51
1	2	67	150	65	785.74	451.2	700.3	498.3	778	686.9	444.5	466.9	28.89	1.81	3	3	14.8	17.7	24.46	27.4	15.46	18.9	26.92	29.87	24.72	27.66
1	2	61	165	77.5	796.5	393.3	400.6	410.2	433.5	406.8	1406.1	819.1	28.47	1.83	3	3	15.3	19.3	15.67	19.66	14.67	19.16	16.32	20.31	16.95	20.94
1	2	53	163	64	764.77	383	327.9	360.7	385.8	316.1	364.3	160.6	24.09	1.76	3	3	10.7	12.7	8.94	10.91	9.03	11.5	10.52	12.48	9.2	11.17
1	1	54	178	80	804.69	363.4	494.1	450	507.9	433.8	822.8	286.4	25.25	1.85	3	3	10.8	13.5	15.6	18.29	12.9	16.08	15.65	18.33	14.13	16.82
1	1	25	189	71	734.31	393.8	416.7	450.8	455.4	424.9	861	397.9	19.88	1.69	3	3	7.7	9.2	8.22	9.73	8.31	10.32	9.19	10.7	8.84	10.35
1	2	53	160	65	795.48	407.3	421.1	396.7	447.5	388.6	793.2	455.2	25.39	1.83	4	4	18	20.9	18.73	21.61	15.93	19.31	19.03	21.91	18.09	20.97
1	1	56	168	72	732.4	454.2	523	546.8	534.3	525.4	210.4	155.3	25.51	1.68	3	3	10.8	12.6	12.64	14.42	12.48	14.75	12.88	14.65	13.24	15.02
1	1	61	165	75	811.67	391.7	512.9	500.1	575	524.5	546	195.8	27.55	1.87	3	3	12.3	14.7	16.8	19.22	15.22	18.14	18.62	21.03	17.97	20.39
1	1	69	165	70	814.39	396.4	407.8	446.8	456.8	403.2	717.1	549.8	25.71	1.87	3	3	10.2	12.1	10.55	12.42	10.82	13.19	11.82	13.69	11	12.88
1	1	71	160	55	751.6	366.2	492.5	642.5	537	474.9	758.6	363.3	21.48	1.73	3	3	9.5	11.9	13.47	15.84	17.24	20.1	14.61	16.98	13.55	15.91
1	2	52	158	70	721.19	469.4	452.4	467.8	504	443.4	522.6	179	28.04	1.66	3	3	13.2	15.2	12.69	14.64	12.23	14.68	14.06	16	13.04	14.98
1	2	69	155	130	720.46	335.6	393.2	372.6	463.8	377.8	298.3	377.8	54.11	1.66	3	3	7.8	9.8	9.44	11.38	8.04	10.47	11.3	13.23	9.57	11.51
1	1	59	170	70	793.9	445.6	633.2	620.2	493.6	641.8	203.4	98.1	24.22	1.83	3	3	9.4	11.3	13.92	15.86	12.87	15.32	10.56	12.51	14.61	16.56
1	1	64	170	60	817.38	374.9	400	340.5	382.8	301.7	450	342	20.76	1.88	3	3	11	13	11.89	13.85	8.87	11.32	10.96	12.91	9.25	11.2
1	1	63	170	65	752.01	380.5	469.8	449.6	485.9	426	591.4	221.5	22.49	1.73	3	3	8.6	10.1	10.85	12.3	9.59	11.54	11.25	12.7	10.25	11.7
1	1	63	163	63	793.95	405.4	578.1	581.8	617.2	590.4	542.8	167.8	23.71	1.83	3	3	7.6	9	11.17	12.54	10.63	12.49	12.15	13.52	11.84	13.21
1	2	66	150	65	724.17	412	440.7	644.5	488.4	439.6	169.7	78.9	28.89	1.67	3	3	10.7	13.3	11.62	14.17	17.06	20.12	12.86	15.42	12.21	14.77
1	1	65	170	60	758.12	492.4	102.1	381.4	535	452.8	466	437.3	20.76	1.74	3	3	13.52	15.64	10.73	12.84	9.15	11.77	14.6	16.72	12.92	15.03
1	2	69	155	59	723.98	448.1	165.5	256	501.5	424.8	409.3	340.5	24.56	1.67	3	3	9.18	10.19	7.4	8.41	6.56	8.07	10.46	11.47	9.11	10.12
1	2	65	158	60	703.45	543.2	597.7	1003.2	575.8	493.6	517.5	455.3	24.03	1.62	3	3	17.15	19.47	19.07	21.4	32.33	35.16	17.89	20.21	16.1	18.43
1	2	61	159	46	744.12	527	190.7	539.6	590.2	520.7	454.3	508	18.2	1.71	4	3	19.47	22.05	13.81	16.39	18.75	21.82	21.44	24.01	20.04	22.61
1	1	45	177	80	799.67	571.5	178.7	292.2	626.9	540	496	489.2	25.54	1.84	3	3	13.69	15.83	8.51	10.65	8.06	10.7	15.1	17.25	13.38	15.52
1	1	64	170	65	769.67	478.4	118.9	204.7	518.4	424.5	449	431.1	22.49	1.77	3	3	15.24	16.66	13.21	14.63	11.7	13.62	16.24	17.66	14.09	15.5
1	1	61	175	75	724.19	400.3	332.1	692.4	430.8	363.4	342.3	325.9	24.49	1.67	4	5	10.4	12.08	8.41	10.09	18.03	20.21	11.12	12.8	9.9	11.59
1	2	56	164	61	734.52	544	294	491	599	509.9	501.8	476.6	22.68	1.69	3	3	16.35	19.06	11.18	13.89	13.49	16.7	17.87	20.58	15.87	18.57
1	1	67	170	59	711.42	472.3	267.5	618.5	512.2	459.6	410.2	402	20.42	1.64	3	3	19.52	22.04	14.65	17.16	24.93	27.94	20.52	23.04	19.86	22.38
1	1	64	180	80	756.14	448.9	391.5	510.7	492.7	424	389.8	373.6	24.69	1.74	3	3	12.66	14.82	10.81	12.97	13.68	16.35	13.78	15.94	12.5	14.66
1	1	68	165	60	704.17	457.8	244.1	473.9	474.7	415.1	352.8	379.9	22.04	1.62	5	5	16.06	19.17	11.34	14.45	15.48	19.1	16.1	19.21	15.11	18.23
1	1	48	170	65	725.55	259.2	1150	1867.2	286.5	250.5	214.8	209.1	22.49	1.67	4	5	4.21	6.04	23	24.83	37.49	39.82	4.94	6.78	4.45	6.28
2	1	42	165	70	717.85	337.7	342.7	324.5	359.95	336.1	270.1	254.6	25.71	1.65	3	3	15.9	20.24	16.2	20.54	15.11	19.45	17.23	21.57	15.8	20.14
2	1	63	170	75	761.87	439.8	415	395.3	412.45	416.85	212.7	95.6	25.95	1.75	4	4	18.81	22.06	17.57	20.81	16.58	19.82	17.44	20.68	17.66	20.9
2	2	74	160	55.5	692.75	322.1	580.2	595.65	678.7	659.75	257.4	144.2	21.68	1.59	3	4	26.68	33.33	24.44	31.08	25.27	31.91	29.71	36.36	28.7	35.34
2	1	58	178	80	729.67	361.5	386.1	362.85	378.5	367.8	335.2	189.9	25.25	1.68	3	3	26.4	32.36	28.61	34.56	26.53	32.48	27.93	33.88	26.97	32.92
2	1	54	173	75	784.74	375.2	408.5	365.35	372.4	392.95	353.3	127	25.06	1.8	3	3	18.56	23.69	20.66	25.79	17.94	23.07	18.38	23.51	19.68	24.81
2	1	68	178	80	822.68	302.9	357.8	291.05	341.75	352.9	333.1	123.6	25.25	1.89	3	3	27.47	36.93	34.16	43.62	26.02	35.48	32.2	41.66	33.56	43.02
2	1	60	160	65	763.49	422.6	463.9	386.65	440.4	451.15	106.6	105.6	25.39	1.76	4	4	11.99	14.4	13.39	15.81	10.76	13.18	12.59	15.01	12.96	15.37
2	1	61	170	65	797.25	356.3	399.7	386.9	411.65	411.05	630	82.1	22.49	1.83	3	4	12.75	16.52	14.76	18.53	14.17	17.94	15.31	19.09	15.29	19.06
2	1	58	165	66	774.57	340.3	378.2	349.9	406.25	403.05	273.4	100.7	24.24	1.78	4	5	8.18	11.22	9.43	12.47	8.5	11.53	10.36	13.39	10.25	13.29
2	1	55	165	50	752.64	321.8	610.6	506.2	553.5	607.7	109.5	77.8	18.37	1.73	5	5	22.4	25.89	26.81	30.3	21.63	25.12	23.98	27.47	26.67	30.16
2	1	54	168	80	765.08	325.4	375.9	388.65	388.4	394.5	108	132.6	28.34	1.76	4	5	21.12	27.23	25.35	31.46	26.41	32.52	26.39	32.5	26.9	33.01
2	2	70	160	65	681.79	344	437.2	431.45	420	430.8	284.1	385.7	25.39	1.57	3	3	12.18	14.74	16.17	18.74	15.92	18.49	15.43	18	15.89	18.46
2	2	67	164	65	692.64	496.4	564.3	518.45	614.7	604.35	611.5	147.2	24.17	1.59	3	3	19.67	22.43	22.74	25.5	20.67	23.42	25.02	27.77	24.55	27.31
2	2	35	168	50	748.6	363.8	391.3	419.95	434.75	413.3	251.5	147.9	17.72	1.72	3	4	12.79	15.83	13.99	17.03	15.24	18.27	15.88	18.92	14.95	17.98
2	1	66	170	55	730.13	457.7	526.7	518.25	546.05	549.6	187.2	153.2	19.03	1.68	4	4	27.54	32.04	32.37	36.87	31.77	36.28	33.72	38.23	33.97	38.48
2	2	61	165	70	728.73	366.1	435.5	387	469.45	449.65	600	177.6	25.71	1.68	3	3	10.16	12.27	12.49	14.59	10.86	12.97	13.62	15.73	12.96	15.07
2	2	62	163	65	718.59	431	551.4	538.45	584.4	582	443.2	171.6	24.46	1.65	3	3	24.23	27.58	31.93	35.28	31.1	34.46	34.04	37.4	33.89	37.24
2	2	70	158	60	680.23	413.6	469	471.7	461.35	495.2	383.9	275.4	24.03	1.56	3	3	6.32	7.71	7.35	8.74	7.4	8.79	7.21	8.6	7.84	9.23
2	2	73	168	70	709.23	448.9	534.3	547.25	537.95	573.15	315.4	187.5	24.8	1.63	4	4	20.33	23	24.7	27.38	25.37	28.04	24.89	27.56	26.69	29.37
2	1	65	176	71	734.22	389.5	441.2	438	440	453.45	411	237.6	22.92	1.69	3	4	18.51	22.12	21.45	25.06	21.26	24.88	21.38	24.99	22.14	25.75
2	2	47	169	68	717.57	486.8	506.6	473.65	545	540.5	126.2	124.3	23.81	1.65	5	5	17.95	21.58	18.82	22.46	17.36	21	20.53	24.16	20.33	23.96
2	2	66	158	79	668.5	394.1	438.5	429.75	468.65	453.35	204.7	175.3	31.65	1.54	5	4	11.98	14	13.56	15.58	13.24	15.27	14.63	16.65	14.08	16.11
2	1	67	174	80	737.68	407	413.1	376.1	242.25	412.7	82	106.5	26.42	1.7	4	4	9.02	10.5	9.17	10.66	8.22	9.71	4.77	6.25	9.16	10.65
2	2	75	153	60	721.34	408	480.9	472.35	480	496.35	75.2	89.5	25.63	1.66	5	5	17.76	22.02	21.69	25.96	21.23	25.5	21.65	25.91	22.53	26.79
2	2	62	176	90	745.82	362.4	383.6	378.55	396.45	372.2	567.4	231.5	29.05	1.72	3	3	13.56	16.48	14.53	17.44	14.3	17.21	15.11	18.03	14.01	16.93
2	1	57	175	62.5	715.9	413	442.3	422.05	474.1	460.25	220.7	126.4	20.41	1.65	4	4	10.8	13.78	11.78	14.75	11.11	14.08	12.84	15.81	12.38	15.35
2	1	61	168	70	704.8	426	540.9	413.3	566.2	562.5	443.5	155.3	24.8	1.62	3	3	17.66	21.14	23.36	26.84	17.03	20.51	24.62	28.1	24.43	27.91
2	1	60	160	80	700.1	409	462.4	464.05	502.7	514.65	138.5	91.8	31.25	1.61	5	5	16.33	18.48	18.74	20.89	18.82	20.97	20.56	22.71	21.1	23.25
2	2	69	156	80	719.4	398.2	389.1	463.7	385.35	426.9	142.9	112.2	32.87	1.65	4	4	18.16	21.66	17.66	21.16	21.72	25.22	17.46	20.96	19.72	23.22
2	2	63	160	67.5	660.76	446.4	531.1	506.4	554.4	558.6	449.5	242.5	26.37	1.52	3	3	15.91	18.51	19.42	22.03	18.4	21	20.39	22.99	20.56	23.17
2	1	45	170	80	750.21	300.3	338.2	349.55	373.1	352.1	124.2	125.6	27.68	1.73	4	5	8.76	11.93	10.26	13.44	10.71	13.89	11.65	14.82	10.81	13.99
2	1	60	160	59	726.63	475.6	484.4	498.05	487.7	507.2	183.6	145.8	23.05	1.67	4	4	18.38	21.56	18.77	21.96	19.39	22.58	18.92	22.11	19.81	22.99
2	1	40	175	90	726.63	403.8	422.2	434.4	431.15	427.75	230.7	99.2	29.39	1.67	5	5	9.37	11.42	9.89	11.94	10.24	12.29	10.14	12.19	10.05	12.1
2	2	60	165	60	687.54	438.6	558.3	524.9	584.3	575.5	132.4	109.7	22.04	1.58	5	5	15.09	18.57	20.15	23.64	18.74	22.23	21.26	24.74	20.88	24.37
2	2	59	162	57	690.65	490.9	528.4	495.3	561.65	566.7	154.7	143.6	21.72	1.59	4	4	46.98	59.34	51.52	63.87	47.52	59.87	55.54	67.89	56.15	68.5
2	1	72	170	70	702.8	321	474	434.75	419.55	483.95	336.2	114.6	24.22	1.62	3	3	37.22	47.79	59.99	70.56	54.15	64.72	51.89	62.46	61.47	72.04
2	2	53	165	70	662.27	428	478.2	481.95	464.7	450.2	299.5	287	25.71	1.52	3	3	23.86	27.39	27.07	30.6	27.31	30.84	26.21	29.74	25.28	28.81
2	2	73	160	55	687.99	438.4	501.6	495.5	524.15	547.5	311.8	310.4	21.48	1.58	3	3	9.78	11.59	11.45	13.26	11.29	13.1	12.05	13.86	12.67	14.47
2	1	55	173	71	717.06	326.3	394.7	393.65	404.95	405.55	184.4	120.2	23.72	1.65	4	4	45.03	62.36	58.1	75.43	57.9	75.23	60.06	77.39	60.17	77.5
2	2	65	155	60	651.23	412.5	473.8	420	533.6	542.8	534.8	334.2	24.97	1.5	4	3	12.09	14.86	14.3	17.07	12.36	15.13	16.45	19.22	16.78	19.55
2	1	66	168	68	655.25	345.2	396.1	355.8	425.2	461.5	486.2	201.2	24.09	1.51	4	4	11.65	14.36	13.76	16.48	12.09	14.8	14.98	17.69	16.49	19.2
2	1	70	172	75	645	425.6	492.7	523.3	550.9	574.3	517	331.2	25.35	1.48	3	4	11.13	13.52	13.26	15.66	14.24	16.63	15.11	17.5	15.86	18.25
2	1	69	170	72	663.7	401.9	445.3	421	469.3	470.1	252.8	146	24.91	1.53	3	3	9.99	11.92	11.28	13.2	10.56	12.48	11.99	13.91	12.01	13.94
2	1	75	169	66	668.56	477.3	502.7	483.2	479.1	484.3	103.5	101.3	23.11	1.54	3	3	14.8	17.44	15.72	18.37	15.01	17.65	14.86	17.5	15.05	17.69
2	2	68	160	62	670.1	330.5	400.3	417.2	380.5	424.7	224.6	331.2	24.22	1.54	3	3	7.82	9.81	9.89	11.89	10.4	12.39	9.31	11.3	10.62	12.61
2	2	67	158	63	655.67	411.6	452.3	431	500.2	511.4	499.7	342.2	25.24	1.51	4	4	10.94	13.08	12.24	14.37	11.56	13.69	13.76	15.89	14.11	16.25
2	1	80	175	78	657.6	515.3	577.6	550.4	574.1	570	235.8	488.9	25.47	1.51	3	4	13.13	16.22	15.09	18.18	14.23	17.32	14.98	18.07	14.85	17.94
2	1	78	173	76	671.3	365.7	402.5	436.2	452.7	488.2	258.7	463.2	25.39	1.54	4	5	9.84	12.1	11.06	13.32	12.18	14.43	12.72	14.98	13.9	16.15
2	1	58	170	72	650.89	392.6	434.2	488.7	483.6	489.1	336.1	533.7	24.91	1.5	5	5	10.8	13.3	12.21	14.7	14.06	16.55	13.88	16.38	14.07	16.56
2	1	43	168	65	660.2	570.6	580.7	600.3	677.2	655.7	535.2	427.1	23.03	1.52	4	5	19.57	22.89	19.98	23.29	20.76	24.08	23.85	27.16	22.98	26.3
2	2	65	156	61	667.9	453.9	500.1	517.4	589.3	613.9	449.3	372.5	25.07	1.54	3	3	13.63	16.52	15.32	18.2	15.95	18.83	18.56	21.45	19.46	22.34
2	1	55	174	82	656.32	500.7	513.5	560.7	528.4	535.1	233.6	475.1	27.08	1.51	3	3	12.75	15.52	13.15	15.92	14.61	17.38	13.61	16.38	13.82	16.59
2	1	54	168	75	674.35	492	554.3	617.4	588.1	611.4	611.4	499.6	26.57	1.55	3	4	13.71	16.45	15.79	18.53	17.9	20.64	16.92	19.66	17.7	20.44
2	1	53	165	60	652.7	473.1	510.3	486.2	517.4	533	570.4	338.6	22.04	1.5	4	4	12.58	14.66	13.73	15.82	12.99	15.07	13.95	16.04	14.44	16.52
2	1	48	175	75	653.45	544.8	611.9	630.9	679.4	700.6	549.2	471.2	24.49	1.5	3	3	14.74	17.57	16.9	19.73	17.51	20.34	19.08	21.9	19.76	22.59
2	2	70	162	64	675.16	435.2	477.8	501.3	545.3	581.7	473.1	388.4	24.39	1.55	3	4	11.75	14.21	13.14	15.6	13.91	16.37	15.35	17.8	16.53	18.99
2	1	47	175	60	655.12	327.4	358.9	343.1	387.6	420.7	533	247.1	19.59	1.51	4	5	8.24	10.4	9.24	11.4	8.74	10.9	10.15	12.31	11.2	13.36
2	1	56	167	70	660.46	472.8	499.8	452.1	473.6	490.7	366.4	158.9	25.1	1.52	5	5	14.3	17.03	15.27	18	13.55	16.28	14.32	17.06	14.94	17.67
2	1	59	174	67.5	670	513.4	588.8	622.7	633.7	640.1	455.3	340.9	22.29	1.54	4	5	17.23	21.03	20.32	24.11	21.71	25.5	22.16	25.95	22.42	26.21
2	1	58	160	68	671.5	447.1	489.1	505	525.5	557.3	346.8	310.6	26.56	1.54	3	3	12.51	15.34	13.95	16.78	14.5	17.33	15.2	18.03	16.29	19.12
2	1	52	164	65	650.01	403.2	495.8	473.2	500.1	502.9	255	146.8	24.17	1.5	3	3	10.15	12.1	12.93	14.88	12.25	14.2	13.06	15.01	13.14	15.09
2	1	62	170	60	670.55	496.8	588	601.2	599.7	603.8	611	499.1	20.76	1.54	3	4	15.65	18.72	19.08	22.16	19.58	22.66	19.52	22.6	19.68	22.75
2	1	65	175	65	668.47	506.2	575.4	637.4	618.3	626	330.8	472.5	21.22	1.54	4	4	16.31	19.78	19.01	22.48	21.43	24.91	20.69	24.16	20.99	24.46
2	1	77	155	65	658.37	375.8	413.1	477.1	498.9	523.4	469.2	102.5	27.06	1.51	3	3	10.07	12.43	11.31	13.67	13.42	15.78	14.14	16.51	14.95	17.32
2	1	73	175	81	673.08	479.1	520	559.3	580.2	601.7	453.1	254.3	26.45	1.55	3	3	14.57	17.5	16.07	18.99	17.5	20.43	18.27	21.19	19.05	21.98
2	1	61	172	75	669.09	423.5	499.3	545	530.1	549.2	411.7	336.7	25.35	1.54	3	3	11.79	14.41	14.37	16.99	15.93	18.54	15.42	18.03	16.07	18.68
2	2	69	159	65	692.5	527.3	580.3	487.6	589.1	599.5	257.3	500.7	25.71	1.59	4	4	13.71	15.71	15.29	17.29	12.52	14.53	15.55	17.55	15.86	17.86
2	2	65	157	60	651.37	464.4	513.4	546.2	588.8	599.3	352.9	287.9	24.34	1.5	3	4	14.12	17.22	15.94	19.04	17.15	20.26	18.73	21.84	19.12	22.23
2	2	72	165	63	668.23	440.7	469.3	533.1	549.3	561.2	344.7	313	23.14	1.54	5	5	12.93	15.63	13.94	16.65	16.21	18.91	16.78	19.48	17.2	19.91
2	1	66	160	60	688.16	342.1	388.2	413.3	445.9	463.6	285.8	249.8	23.44	1.58	5	4	8.49	10.6	9.92	12.03	10.69	12.81	11.7	13.82	12.25	14.36
2	1	65	170	86	643.02	438.2	499.1	544.9	546.1	577.1	304.9	299.7	29.76	1.48	4	4	12.31	14.9	14.38	16.97	15.93	18.53	15.97	18.57	17.03	19.62
2	2	72	176	80	720.87	510.2	550	586.7	604.8	624.8	428.6	327.9	25.83	1.66	5	5	15.62	18.92	17.1	20.4	18.46	21.76	19.13	22.43	19.87	23.17
2	2	58	169	65	685.2	571.9	621	671.4	688.4	701.9	473.1	355.1	22.76	1.58	3	3	18.42	21.83	20.3	23.71	22.22	25.63	22.87	26.28	23.39	26.79
2	2	47	176	75	661.09	416.3	465.1	502.3	511.7	528.3	353.6	304.2	24.21	1.52	4	4	10.52	12.9	12.03	14.41	13.18	15.56	13.47	15.86	13.99	16.37
2	2	55	175	70	675	472.5	513.8	485.7	475.3	477.1	301.4	176.4	22.86	1.55	3	3	12.31	14.29	13.56	15.54	12.71	14.69	12.4	14.37	12.45	14.43
2	2	60	170	80	703.25	435.9	499.2	525.1	543.2	571.4	461.3	345.4	27.68	1.62	5	5	11.18	13.52	13.15	15.48	13.95	16.28	14.51	16.84	15.38	17.72
2	2	57	165	75	655	400.9	489.2	443.7	493.1	499.8	252.4	143.1	27.55	1.51	4	4	9.6	11.29	12.09	13.77	10.81	12.49	12.2	13.88	12.38	14.07
2	2	62	167	74	709.17	588.3	633.8	626.4	699.7	733.2	677.2	502.3	26.53	1.63	3	3	25.78	30.6	28.14	32.97	27.76	32.58	31.57	36.4	33.31	38.14
2	1	41	170	80	675.05	491.3	523.6	565.3	592.3	625.3	317.8	282.7	27.68	1.55	4	5	14.03	17.11	15.15	18.23	16.6	19.69	17.54	20.63	18.69	21.77
2	1	65	170	88	668.38	425.8	451.2	488.8	576.8	600.1	301.7	322.8	30.45	1.54	4	4	11.64	14.63	12.51	15.5	13.8	16.8	16.82	19.82	17.62	20.62
2	1	69	169	59	642.31	336.1	388	429.1	424.5	434.2	413.2	383.6	20.66	1.48	5	5	7.9	9.92	9.43	11.45	10.65	12.66	10.51	12.53	10.8	12.81
2	2	66	158	64	650	317.5	391.4	410.7	422.1	447.3	411.3	188.4	25.64	1.5	5	5	7.37	9.37	9.55	11.55	10.12	12.12	10.45	12.46	11.2	13.2
2	1	59	170	65	688.02	499.7	549.1	604.3	623.8	635.5	463.6	217.9	22.49	1.58	4	4	14.15	16.86	15.82	18.53	17.68	20.39	18.34	21.05	18.73	21.44
2	1	31	177	87	679.07	475.6	481.3	530.4	550.2	552	286.3	182.5	27.77	1.56	3	3	12.5	14.56	12.68	14.74	14.18	16.24	14.79	16.84	14.84	16.9
2	1	63	170	60	752.35	483.2	500.2	530.1	579.3	601.8	470.8	320.5	20.76	1.73	3	3	13.04	15.25	13.57	15.78	14.52	16.73	16.07	18.28	16.78	18.99
2	1	44	170	95	701.19	435.8	489.7	499.3	527.6	541.4	482.5	359.1	32.87	1.61	3	3	11.09	13.21	12.73	14.84	13.02	15.13	13.88	15.99	14.29	16.41
2	1	45	180	96	671.38	445.7	492.6	524	566.3	579.9	393	324.7	29.63	1.54	4	4	11.61	13.85	13.06	15.3	14.04	16.28	15.35	17.59	15.77	18.01
2	1	68	175	80	662.31	513.4	566.3	513.7	545.2	548.8	341.2	103.4	26.12	1.52	5	5	12.96	15.76	14.59	17.39	12.97	15.77	13.94	16.74	14.05	16.85
2	2	71	163	65	693.16	475.9	477.2	501.3	534.7	541.2	773	366.4	24.46	1.59	5	5	12.63	14.71	12.67	14.75	13.42	15.49	14.45	16.53	14.65	16.73
2	2	60	160	74	664.39	372.8	343.5	439.5	438.6	376.7	219.5	229.4	28.91	1.53	3	4	12.49	14.71	11.33	13.55	15.12	17.34	15.08	17.3	12.64	14.86
2	1	58	150	98	723.45	326.5	355.9	294.5	428.5	398.3	173.4	204.2	43.56	1.66	4	5	7.54	9.17	8.36	10	6.64	8.27	10.4	12.03	9.55	11.19
2	1	74	174	95	734.98	329	694.3	489.1	493.5	379.4	281.3	220.4	31.38	1.69	5	5	10.12	13.28	24.87	28.03	16.59	19.75	16.76	19.92	12.16	15.32
2	1	26	174	67.5	735.94	452.5	593.4	493.8	418.5	401.5	147.4	292.4	22.29	1.69	4	5	17.12	19.71	23.26	25.85	18.92	21.51	15.64	18.23	14.9	17.49
2	2	69	160	67.5	792.35	327.8	433.6	693.4	528.9	419.5	194.8	179.9	26.37	1.82	3	3	6.72	9.43	9.76	12.47	17.24	19.94	12.5	15.21	9.36	12.06
2	2	64	150	49	694.54	493.7	483.5	493.5	398	389.5	174	282.3	21.78	1.6	3	3	18.76	21.18	18.32	20.74	18.75	21.17	14.65	17.07	14.29	16.71
2	1	57	167	70	638.43	427.8	573.6	432.9	439.8	482.4	208.4	228.4	25.1	1.47	3	4	9.28	11.57	13.23	15.52	9.42	11.71	9.61	11.9	10.76	13.05
2	2	58	165	75	739.43	327.6	428.4	492.3	432.6	388.4	198.4	219.2	27.55	1.7	4	4	11.69	14.49	16.15	18.94	18.98	21.77	16.34	19.13	14.38	17.18
2	1	64	168	80	749.34	382	558.4	426	419.5	389.2	202.4	248.2	28.34	1.72	3	3	10.85	12.73	16.73	18.61	12.32	14.2	12.1	13.98	11.09	12.97
2	1	37	175	80	719.57	327.5	371.6	234.5	582.3	402.3	284.4	232.4	26.12	1.66	3	3	16.88	20.53	19.65	23.3	11.05	14.7	32.86	36.51	21.57	25.22
2	2	72	167	65	724.52	418.5	477.5	428.3	430.5	398.3	194.5	221.4	23.31	1.67	3	3	12.39	14.83	14.48	16.92	12.74	15.18	12.82	15.25	11.68	14.11
2	2	68	166	80	683.42	428.4	395.7	498.5	490.3	391.4	179.4	204.2	29.03	1.57	4	4	14.71	17.86	13.35	16.5	17.63	20.79	17.29	20.44	13.17	16.32
2	1	70	180	55	701.41	328.6	495.7	637.5	509.6	414.5	209.4	224.4	16.98	1.61	3	4	9.68	11.78	15.67	17.78	20.76	22.86	16.17	18.28	12.76	14.86
2	1	59	170	80	694.31	402.6	684.6	483.5	495	418.5	252.5	200.4	27.68	1.6	5	5	14.2	16.96	26.08	28.84	17.61	20.37	18.1	20.85	14.87	17.63
2	2	59	166	64	725.74	392.5	618.5	392.5	583.4	397.5	275.3	174.2	23.23	1.67	5	4	19.67	24.03	33.51	37.87	19.67	24.03	31.36	35.72	19.98	24.34
2	2	68	164	73	718.32	372.5	394	402.5	428.5	419.4	294.4	212.9	27.14	1.65	4	4	18.08	23.3	19.43	24.65	19.96	25.18	21.58	26.81	21.01	26.24
2	1	63	177	80	720.05	426.9	358.6	428.6	529.9	390.5	194.5	221.4	25.54	1.66	5	5	12.87	14.84	10.49	12.47	12.93	14.9	16.45	18.43	11.6	13.58
2	2	62	158	62.5	718.3	316.9	439	416.7	489.6	428.5	289.4	228.4	25.04	1.65	3	3	23.4	29.71	34.85	41.16	32.76	39.07	39.6	45.91	33.87	40.18
2	2	68	150	60	735.24	378.5	358.5	463.4	589.4	418.5	629	212.9	26.67	1.69	4	4	10.72	13.54	10	12.83	13.76	16.58	18.26	21.09	12.15	14.97
2	1	66	165	70	719.42	398.8	375.6	385.7	493.5	439.1	274.5	228.4	25.71	1.65	3	3	7.91	10.29	7.31	9.69	7.57	9.95	10.35	12.73	8.95	11.33
2	1	62	170	60	692.42	465.3	485	357.4	403.5	390.5	283.5	205.4	20.76	1.59	3	3	15.5	17.5	16.24	18.24	11.44	13.44	13.17	15.17	12.68	14.68
2	2	64	168	73	712.53	327.5	639.5	493.5	299.5	429.5	182.5	216.4	25.86	1.64	3	3	10.04	12.76	22.2	24.92	16.51	19.23	8.95	11.67	14.02	16.74
2	2	53	168	90	647.39	623.4	358.6	482.5	594.4	392.6	179.2	205.4	31.89	1.49	4	4	24.36	27.76	12.56	15.97	18.08	21.49	23.06	26.47	14.08	17.48
2	2	57	154	65	663.23	272.5	530.6	429.6	495.6	483.5	272.3	229.4	27.41	1.53	3	4	4.65	6.86	11.15	13.35	8.61	10.81	10.27	12.47	9.96	12.17
2	2	63	165	65	748.24	346.8	348.1	418.5	550.6	397.5	271.5	120.4	23.88	1.72	4	5	11.57	13.57	11.62	13.62	14.38	16.38	19.55	21.55	13.55	15.56
2	1	58	183	83	772.42	472.2	347.5	392	401.5	425.7	168.5	105.2	24.78	1.78	5	5	11.42	13.2	7.94	9.71	9.18	10.96	9.45	11.22	10.12	11.9
2	1	52	175	80	719.42	328.7	374.6	429.5	513.5	418.5	282.3	121.4	26.12	1.65	4	5	6.95	8.97	8.2	10.23	9.7	11.73	11.99	14.02	9.4	11.43
2	2	55	156	65	744.3	482.6	389.6	428.1	518.5	428.5	338.5	142.3	26.71	1.71	3	3	15.52	19.03	11.86	15.37	13.37	16.88	16.94	20.45	13.39	16.9
2	2	57	170	75	657.03	382.6	384	472.5	490.5	453.5	289.5	382.4	25.95	1.51	3	3	11.2	13.2	11.25	13.25	14.31	16.3	14.93	16.92	13.65	15.64
2	1	63	175	60	724.82	492.1	638.4	429.5	506	429.6	293.5	100.5	19.59	1.67	3	4	22.96	26.7	30.9	34.64	19.57	23.31	23.72	27.46	19.57	23.31
2	1	52	175	70	729.42	306.1	503.6	420.5	483.5	473.5	198.4	105.6	22.86	1.68	4	4	29.76	38.6	54.66	63.5	44.19	53.02	52.13	60.97	50.87	59.71
2	1	73	165	65	701.28	473.8	485.5	472	495.1	429.5	392.4	129.5	23.88	1.61	3	3	16.15	19.7	16.64	20.19	16.07	19.62	17.03	20.58	14.31	17.86
2	2	52	162	76	725.83	347	483.1	429.1	492.5	388.5	299.5	118.5	28.96	1.67	3	3	11.8	13.99	17.29	19.48	15.11	17.3	17.67	19.86	13.47	15.66
2	1	48	175	75	649.24	382.5	485.9	420.5	682.4	389.5	182.5	129.5	24.49	1.49	3	3	13.62	16.26	18.02	20.66	15.24	17.88	26.37	29.01	13.92	16.56
2	1	52	170	80	742.64	472	485.6	483.2	503.4	421	185.2	90.3	27.68	1.71	4	4	17.86	21.37	18.47	21.99	18.36	21.88	19.28	22.8	15.55	19.07
2	2	58	165	70	792.92	359.2	395.3	430.6	490.5	432.6	398.5	225.6	25.71	1.82	4	4	11.99	15.49	13.54	17.05	15.07	18.57	17.65	21.15	15.15	18.65
2	2	63	155	65	824.24	385.8	539	398.5	418.5	382.5	273.5	108.3	27.06	1.9	3	3	14.47	17.12	21.27	23.92	15.04	17.68	15.93	18.57	14.33	16.97
2	1	64	165	70	791.26	482.5	358.4	582.4	492.4	392.2	188.5	192.3	25.71	1.82	5	5	21.34	24.75	14.97	18.39	26.46	29.88	21.85	25.26	16.71	20.12
2	1	59	165	66	793.2	309.4	559.6	482.1	582.3	481.8	285.3	137.2	24.24	1.82	4	4	5.86	7.68	12.06	13.88	10.14	11.96	12.63	14.45	10.13	11.95
2	1	50	168	75	726.83	493.5	637.5	421.9	469.1	429.5	218.5	125.4	26.57	1.67	3	3	13.4	16.33	18.16	21.1	11.03	13.96	12.59	15.53	11.28	14.22
2	2	61	160	72	772.67	404.6	539.4	427.2	486.1	398.5	294.5	119.4	28.13	1.78	4	5	9.9	11.31	13.66	15.07	10.53	11.94	12.17	13.59	9.73	11.14
2	2	48	150	65	712.52	349.8	329.1	391.2	596	395.1	172.5	108.3	28.89	1.64	4	4	8.17	9.92	7.58	9.33	9.34	11.09	15.15	16.9	9.45	11.2
2	1	63	175	60	749.24	418	594.4	592.3	591.5	385.4	175.4	100.5	19.59	1.72	5	5	16.4	20.02	24.85	28.47	24.75	28.37	24.71	28.33	14.84	18.46
2	2	62	150	70	718.51	379.6	384.6	328.5	483.6	519	285.3	129.5	31.11	1.65	5	5	6.92	9.08	7.04	9.2	5.7	7.86	9.41	11.57	10.26	12.41
2	1	54	175	70	701.28	492.6	384.2	392.5	468.5	438.4	189.4	128.5	22.86	1.61	4	4	15.86	17.76	11.95	13.85	12.25	14.15	14.99	16.89	13.91	15.81
2	1	58	165	75	782.21	390.4	384	482.1	419.6	399.5	281.4	120.3	27.55	1.8	3	3	12.61	14.91	12.37	14.67	16.11	18.42	13.73	16.03	12.96	15.26
2	1	54	174	82	693.13	627.3	438.5	628	490.6	418.5	337.2	112.5	27.08	1.59	3	3	19.97	22.87	13.09	15.98	19.99	22.89	14.98	17.88	12.36	15.25
2	2	73	160	65	739.46	493	573	348.5	419.6	438.5	274.3	102.5	25.39	1.7	3	3	16.62	20.06	19.88	23.31	10.74	14.18	13.64	17.07	14.41	17.84
2	2	70	160	58	719.33	329.7	463.5	482.5	519.6	391.3	219.3	128.5	22.66	1.65	4	4	32.13	38.67	47.82	54.37	50.05	56.6	54.4	60.95	39.35	45.9
2	1	64	170	88	782.45	319.5	328.3	417.5	593.3	437.7	194.4	192.3	30.45	1.8	5	5	19.7	24.65	20.38	25.33	27.26	32.21	40.82	45.77	28.82	33.77
2	1	72	165	45	724.94	323.4	374.6	348.1	537.6	398.6	182	358.4	16.53	1.67	5	5	18.83	24.23	22.66	28.06	20.68	26.08	34.87	40.28	24.46	29.86
2	2	56	155	75	739.83	483.5	684.3	492.5	431.5	381.1	328.4	102.5	31.22	1.7	5	5	22.57	27.5	33.99	38.92	23.08	28.01	19.61	24.54	16.75	21.68
2	2	66	165	61	764.4	439.5	347.5	528.4	583.6	489.1	284.5	106.5	22.41	1.76	5	5	20.71	23.81	15.72	18.83	25.53	28.63	28.52	31.62	23.4	26.5
2	2	49	167	73	729.43	403.5	378.5	418.5	493.1	391.5	218.4	110.6	26.18	1.68	5	5	9.56	11.49	8.84	10.77	9.98	11.91	12.11	14.04	9.21	11.14
2	2	63	154	61	693.28	432.9	378.4	601.5	491.5	419.5	294.3	129.4	25.72	1.59	3	3	12.49	15.24	10.57	13.32	18.42	21.18	14.55	17.31	12.02	14.77
2	1	67	160	60	801.42	358.5	385.6	327.4	437.6	395.4	198.4	119.3	23.44	1.84	3	3	10.95	14.12	12.01	15.19	9.72	12.9	14.06	17.24	12.4	15.57
2	2	60	161	70	739.16	439	628	427.5	406.5	439.5	284.1	127.3	27.01	1.7	3	3	18.37	20.93	27.39	29.95	17.83	20.39	16.82	19.38	18.4	20.96
2	2	55	162	44	693.27	428.6	506.3	428.1	476.1	683.5	267.4	136.6	16.77	1.59	4	4	10.42	12.21	12.63	14.42	10.4	12.19	11.77	13.56	17.68	19.47
2	1	58	168	75	773.47	329.3	418.9	420.5	438.5	539.5	251.4	105.2	26.57	1.78	3	4	10.46	13.36	14.1	17	14.16	17.06	14.89	17.79	18.99	21.89
2	2	62	157	66.5	783.28	482.1	472.5	418.5	458.1	409.5	254.5	127.8	26.98	1.8	5	5	12.26	15.06	11.96	14.76	10.28	13.07	11.52	14.31	10	12.79
2	2	59	160	60	738.49	392.6	478.4	392.5	493.5	379	239.5	107.3	23.44	1.7	5	4	9.56	11.22	12.01	13.68	9.56	11.22	12.45	14.11	9.17	10.84
2	1	68	169	59	729.03	402.5	319.5	289.5	479.6	385.6	212.3	139.5	20.66	1.68	4	4	11.63	13.89	8.76	11.03	7.72	9.99	14.29	16.55	11.04	13.31
2	1	63	170	71	739.47	321.5	300.5	529.5	438.6	418.3	258.3	120.8	24.57	1.7	5	5	7.85	10.22	7.18	9.55	14.46	16.84	11.57	13.95	10.93	13.3
2	2	50	164	56	632.57	492.3	593.5	382.5	539.3	483.4	330.4	102.5	20.82	1.45	3	3	12.83	15.59	16.03	18.79	9.35	12.11	14.32	17.08	12.55	15.31
2	1	64	175	65	741.92	348	429.5	428.6	493	395.3	248.2	121.6	21.22	1.71	4	4	15.83	18.88	20.25	23.31	20.2	23.26	23.7	26.75	18.39	21.45
2	1	72	175	80	738.95	473.2	329.1	483.9	483.1	419.5	174.3	129.5	26.12	1.7	3	3	9.02	10.54	5.81	7.33	9.26	10.77	9.24	10.76	7.82	9.34
2	2	49	165	65	684.38	428	483.5	348.5	489.5	438.5	281.3	117.4	23.88	1.57	5	5	8.37	10.03	9.67	11.33	6.51	8.16	9.81	11.47	8.61	10.27
2	2	59	172	64	728.44	327.5	328.4	495	438.6	431.6	217.4	105.2	21.63	1.68	4	4	6.64	8.9	6.67	8.93	11.19	13.46	9.66	11.92	9.47	11.73
2	2	69	155	55	774.93	429.6	529.6	593.4	470.5	396.5	628.2	129.7	22.89	1.78	3	3	11.6	13.19	14.67	16.26	16.63	18.22	12.86	14.44	10.59	12.17
2	1	71	176	80	735.83	492.8	439.1	489.2	438.5	406.3	272.4	127.3	25.83	1.69	4	5	12.43	14.17	10.89	12.63	12.33	14.07	10.87	12.61	9.94	11.68
2	1	58	169	65	793.37	348.5	384	592.3	493.6	483.4	169.4	124.5	22.76	1.82	4	4	10.18	13.08	11.51	14.41	19.33	22.23	15.63	18.53	15.24	18.15
2	1	62	170	60	739.5	329.6	635.7	520.4	591.6	361.5	239.4	115.2	20.76	1.7	5	5	7.37	9.96	16.62	19.21	13.13	15.72	15.29	17.88	8.33	10.92
2	2	63	145	45	714.92	382.5	375.6	428.5	403.5	437.5	274.3	128.4	21.4	1.64	5	5	7.57	8.83	7.41	8.67	8.63	9.89	8.05	9.32	8.84	10.1
2	1	59	170	80	824.35	492.9	463.7	492.5	485.3	396.5	218.2	105.3	27.68	1.9	4	4	20.75	23.82	19.34	22.41	20.73	23.8	20.38	23.45	16.09	19.16
2	1	60	172	75	646.38	328.5	463	439.5	501.3	411.6	279.4	110.4	25.35	1.49	3	3	11.63	14.95	17.75	21.06	16.68	20	19.49	22.81	15.41	18.73
2	2	77	150	36	726.66	492	426.3	683.5	486.3	438.5	215.4	124.8	16	1.67	3	3	11.15	13.59	9.33	11.77	16.43	18.87	10.99	13.43	9.67	12.11
2	1	54	165	60	784.42	294.5	388.5	529.4	496.1	399.5	264.1	127.4	22.04	1.8	3	3	8.58	10.74	12.01	14.17	17.15	19.31	15.94	18.1	12.41	14.57
2	1	57	160	68	647.97	374.8	378.2	483.1	488.5	438	280	122.5	26.56	1.49	4	4	7.93	9.65	8.01	9.73	10.71	12.43	10.85	12.57	9.55	11.27
2	1	71	175	81	723.52	472.2	548.3	427.5	483.5	419.5	198.5	102.5	26.45	1.66	4	4	11.98	14.25	14.28	16.54	10.63	12.9	12.32	14.59	10.39	12.66
2	2	65	160	56	724.57	378.5	427.5	480.3	467	398.5	286.2	108.5	21.88	1.67	4	4	9.37	11.94	10.92	13.49	12.58	15.16	12.16	14.74	10	12.58
